# Supplementary material for: Trace analysis of mercury(ii) ions using aptamer-modified Au/Ag core–shell nanoparticles and SERS spectroscopy in a microdroplet channel
Source: Royal Society of Chemistry journal article supplement (doi:10.1039/c2lc41079f), 2012-11-12
Supplement: c2lc41079f.pdf [file c2lc41079f.pdf]

## Supporting Information

# Trace analysis of mercury (II) ions using aptamer-modified Au/Ag core-shell nanoparticles and SERS spectroscopy in microdroplet channel

Eunsu Chung,<sup>†a</sup> Rongke Gao,<sup>†a</sup> Juhui Ko,<sup>a</sup> Namhyun Choi,<sup>a</sup>

Dong Woo Lim,<sup>a</sup> Eun Kyu Lee,<sup>b</sup> Soo-Ik Chang,<sup>c</sup> and Jaebum Choo<sup>\*a</sup>

<sup>a</sup>*Department of Bionano Engineering , Hanyang University, Ansan 426-791, South Korea,*

<sup>b</sup>*College of Bionanotechnology, Gacheon University, Sunnam 461-701, South Korea,*

<sup>c</sup>*Department of Biochemistry, Chungbuk National University, Cheongju 361-763, South Korea*

Submitted to

***Lab on a Chip (revised)***

October 2012

**†Joint first authors**

**\*Corresponding author**

**Address for correspondence:**

**Jaebum Choo**

Telephone: +82-31-400-5201; Fax: +82-31-436-8188; E-mail: [jbchoo@hanyang.ac.kr](mailto:jbchoo@hanyang.ac.kr)

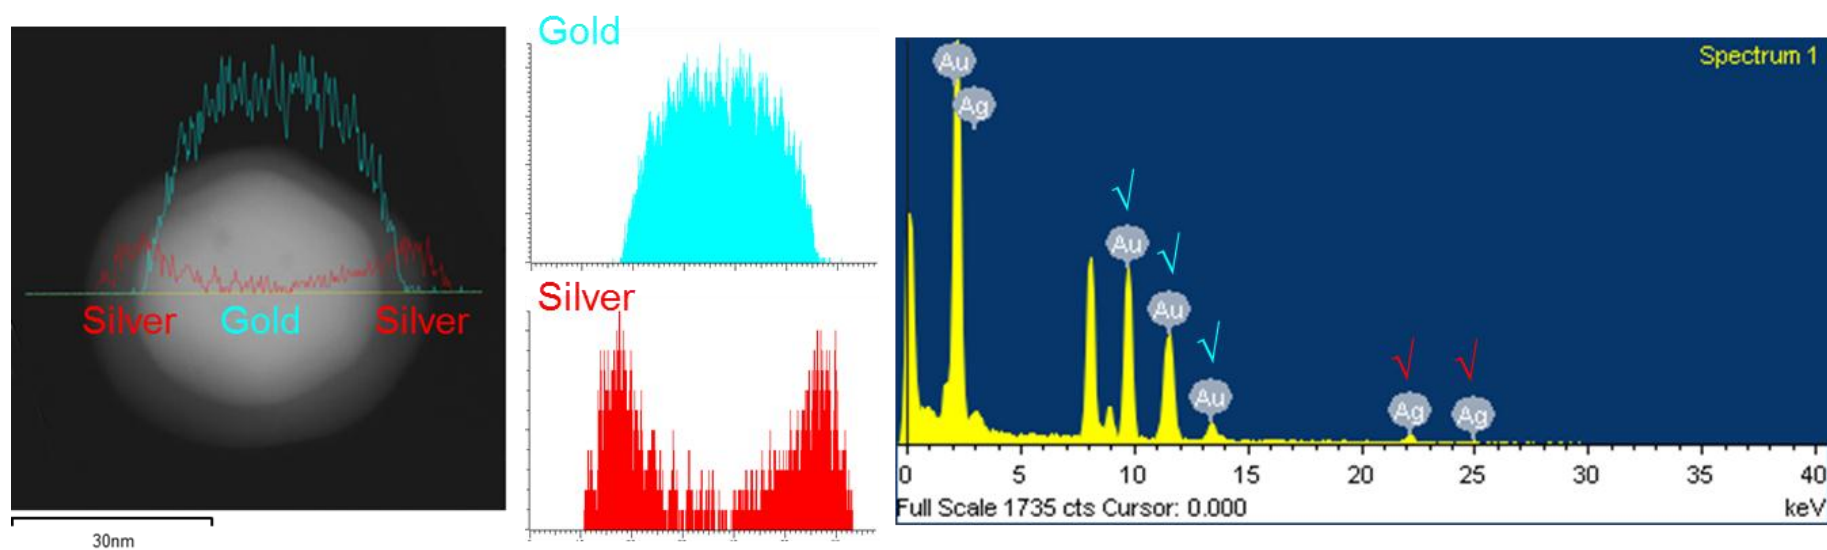

Figure S1. FE-TEM image and EDS profile for a ds DNA-embedded Au/Ag core-shell nanoparticle (4 nm silver shell thickness).

Figure S1

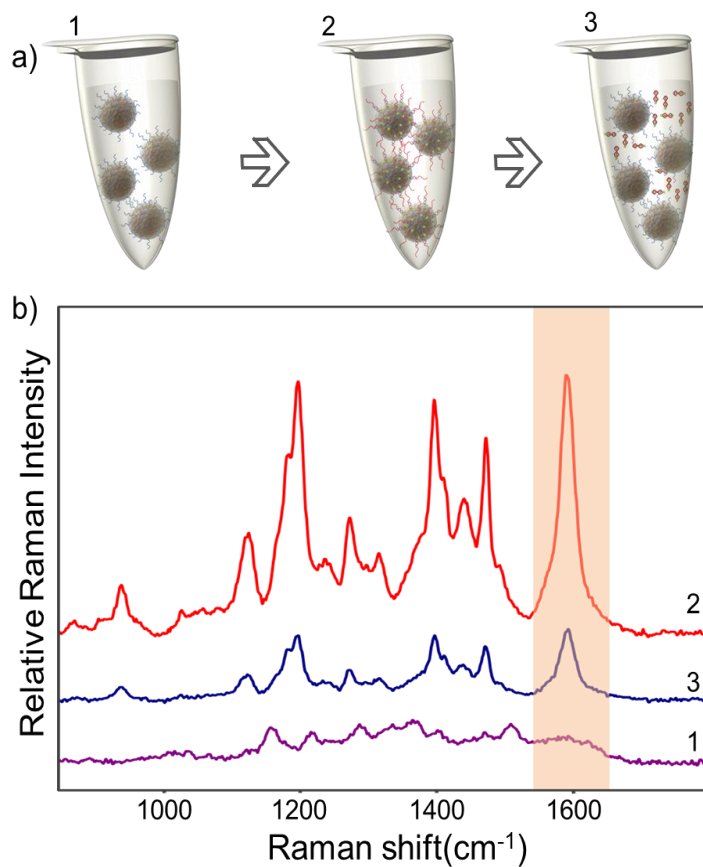

Figure S2. (a) Schematic illustration of  $\text{Hg}^{2+}$  sensing process and (b) SERS spectrum of DNA conjugated  $\text{Au}_{\text{core}}/\text{Ag}_{\text{shell}}$  (1), an aptameric biosensor in the absence of  $\text{Hg}^{2+}$  (2), an aptameric biosensor in the presence  $\text{Hg}^{2+}$  of 100  $\mu\text{M}$  (3). In the presence of mercury (II) ions, Cy3-labeled DNA aptamers are released from the metal surface causing a decrease in the observed SERS signal intensity. Major peak of Cy3 was expressed at 1590  $\text{cm}^{-1}$ .

Figure S2

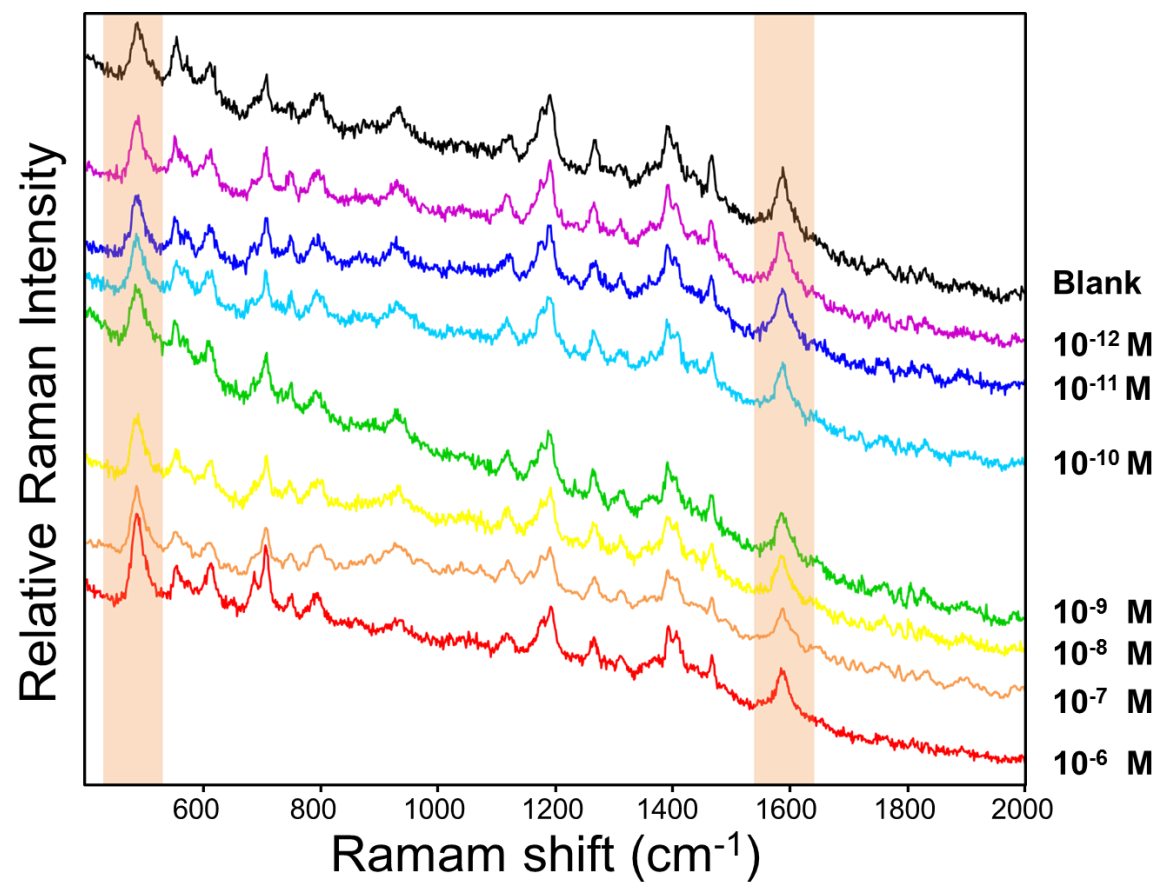

Figure S3. Concentration-dependent raw SERS spectra of Cy3 in PDMS microdroplet channel. Concentration ranged from  $10^{-12}$  to  $10^{-6} \text{ M}$ .

Figure S3
